# Supplementary material for: MAPK4 promotes prostate cancer by concerted activation of androgen receptor and AKT
Source: JCI journal article supplement (doi:10.1172/jci135465), 2021-02-14
Supplement: sd1 [file 1]

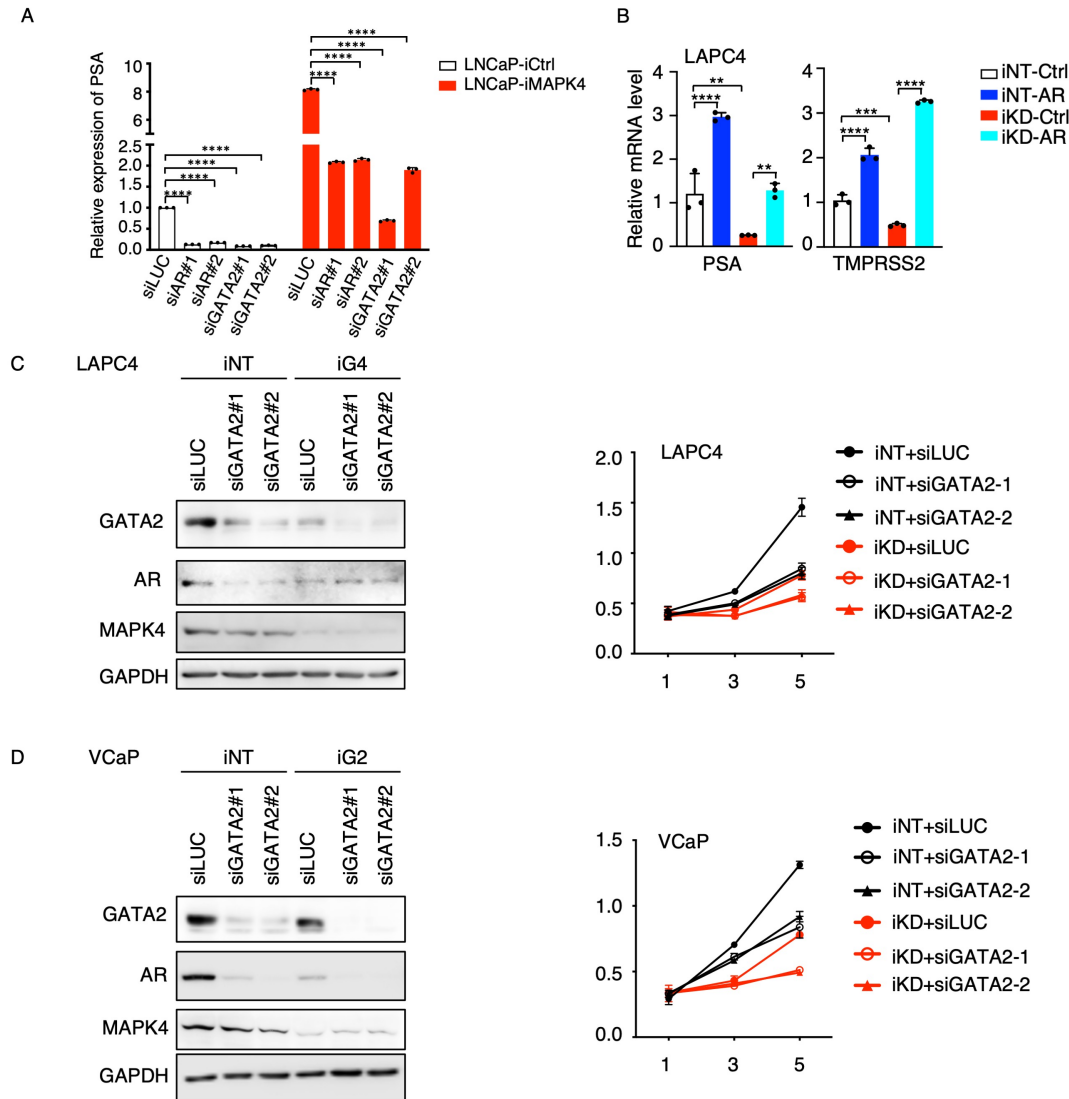

**Supplementary Figure 1. GATA2/AR signaling mediates MAPK4 tumor-promoting activity in prostate cancer.** (A) qPCR on PSA expression in the 0.5  $\mu$ g/ml Dox-induced LNCaP-iMAPK4 and LNCaP-iCtrl cells transfected with siRNA against AR (siAR-1, siAR-2), GATA2 (siGATA2-1, siGATA2-2), or luciferase (siLUC). (B) qPCR on PSA and TMPRSS2 expression in the LAPC4 cells with 2  $\mu$ g/ml Dox-induced knockdown of MAPK4 (ishMAPK4) or control (iNT), with ectopic expression of AR or control (Ctrl). Data represent mean  $\pm$  S.D. Adjusted *P* values determined by two-way ANOVA followed by Dunnett's multiple comparisons in Panel A and one-

way ANOVA followed by Sidak's comparisons in Panel B.  $**P \leq 0.01$ ,  $***P \leq 0.001$ ,  $****P \leq 0.0001$ . Western blots and proliferation assays on the 2  $\mu\text{g/ml}$  Dox-induced MAPK4-knockdown (iG4 or iG2) or iNT control (**C**) LAPC4 cells and (**D**) VCaP cells transfected with siRNA against GATA2 (siGATA2-1, siGATA2-2) or luciferase (siLUC as control). Data represent mean  $\pm$  SEM. Data are representative of at least 3 independent experiments.

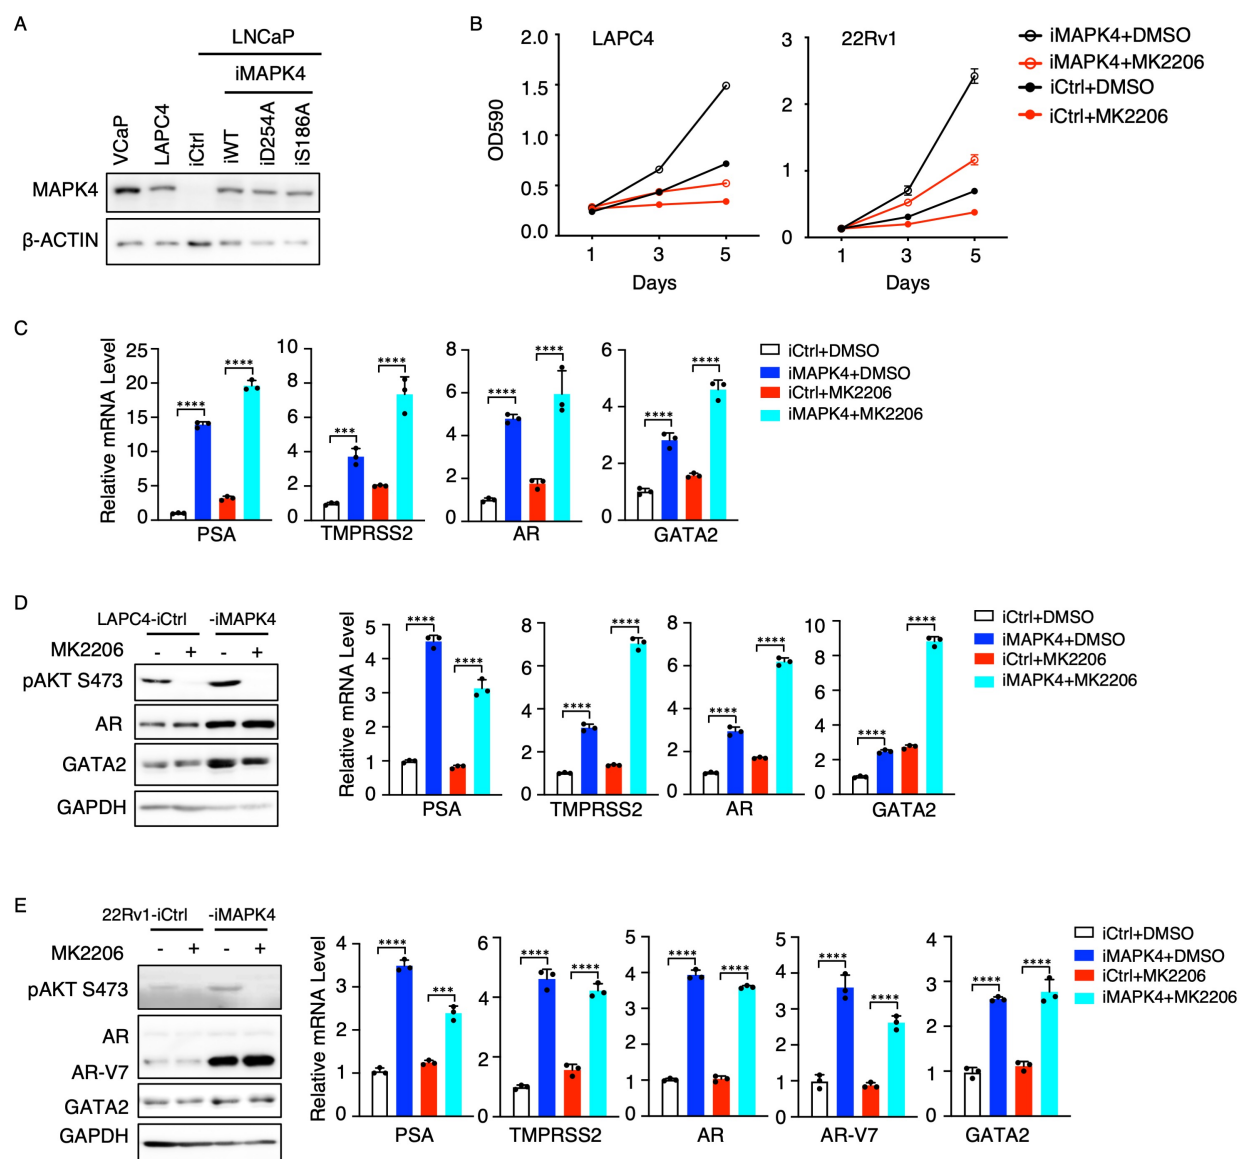

**Supplementary Figure 2. AKT inhibitor treatment did not repress MAPK4-induced GATA2/AR signaling in prostate cancer cells.** (A) Western blots comparing the expression levels of 0.5  $\mu$ g/ml Dox-induced ectopically expressed wild type (iWT) and mutated (iD254A and iS186A) MAPK4 in LNCaP cells and the endogenous MAPK4 in VCaP and LAPC4 cells. (B) Proliferation assays on the LAPC4 and 22Rv1 cells with 0.5  $\mu$ g/ml Dox-induced overexpression of MAPK4 (iMAPK4) or control (iCtrl), treated with 1  $\mu$ M of AKT inhibitor MK2206 or DMSO

control. Data represent mean  $\pm$  SEM. (C) qPCR on LNCaP cells with 0.5  $\mu$ g/ml Dox-induced expression of (iMAPK4) or control (iCtrl), treated with 1  $\mu$ M of AKT inhibitor MK2206 or DMSO control. Proliferation assay and qPCR on the (D) LAPC4 and (E) 22Rv1 cells with 0.5  $\mu$ g/ml Dox-induced overexpression of MAPK4 (iMAPK4) or control (iCtrl), treated with 1  $\mu$ M of AKT inhibitor MK2206 or DMSO control. Data represent mean  $\pm$  S.D. Adjusted *P* values determined by one-way ANOVA followed by Sidak's multiple comparisons. \*\*\**P*  $\leq$  0.001. \*\*\*\**P*  $\leq$  0.0001. Data are representative of at least 3 independent experiments.
